# Supplementary material for: Insight into the process of postpartum care utilisation and in-home support among vulnerable women in the Netherlands: an in-depth qualitative exploration
Source: HighWire-hosted journal article supplement (doi:10.1136/bmjopen-2020-046696), 2021-09-01
Supplement: bmjopen-2020-046696supp001_data_supplement.pdf [file bmjopen-2020-046696supp001_data_supplement.pdf]

Figure S1 Topic List used during the interviews

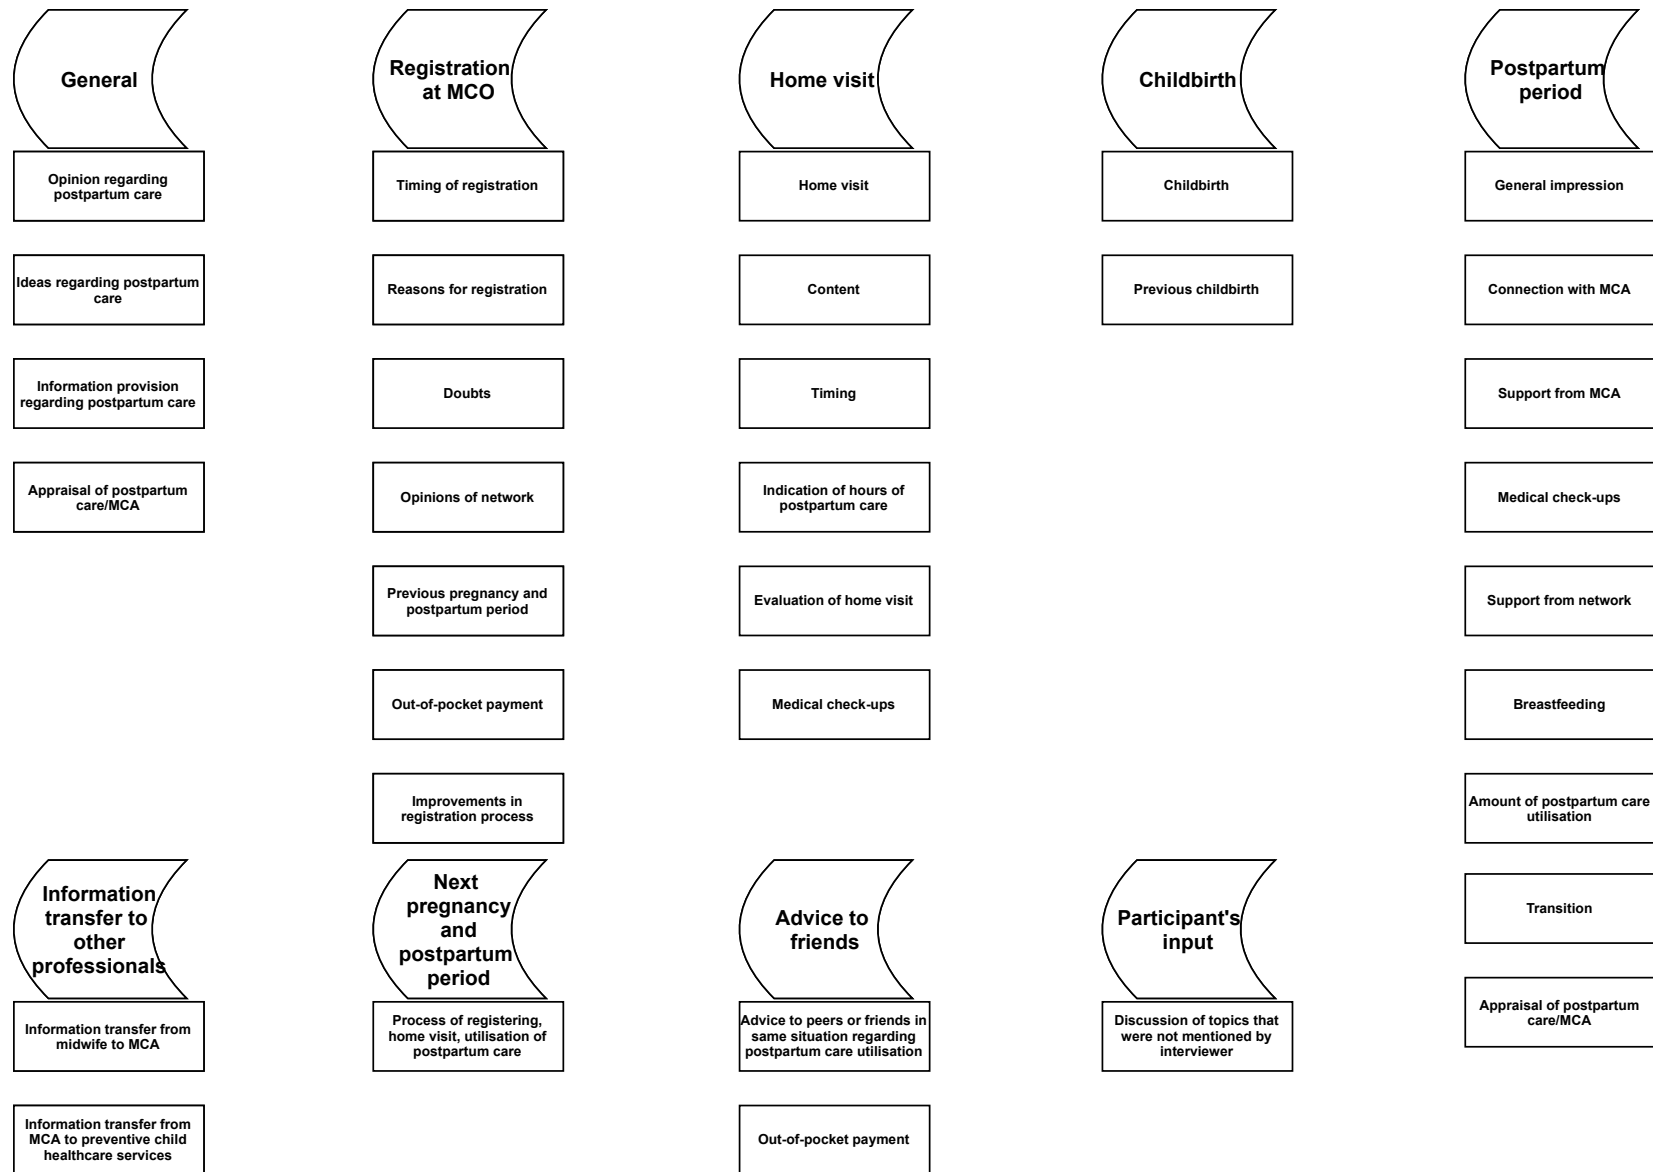

MCA: maternity care assistant

MCO: maternity care organisation
